# Supplementary material for: Composition of the essential oil of Satureja metastasiantha : a new species for the flora of Turkey
Source: publisher site journal article supplement (doi:10.1515/znc-2019-0208), 2020-03-12
Supplement: Supplementary file 1 [file znc-2019-0208_suppl.docx]

**Supplementary Material**

**Table S1.** Antibacterial and antifungal activity screening of essential oil of methanol extract of

*S*. *metastasiantha**

| **Tested Material** | ***E.coli*** | ***S. aureus*** | ***M.smegmatis*** | ***C.albicans*** |
| --- | --- | --- | --- | --- |
| Essential oil of *S*. *metastasiantha* | NA | 128 | NA | NA |
| MeOH extract of *S.* *metastasiantha* | 2048 | 2048 | 1024 | 2048 |
| Oxacillin | NT | 16 | 16 | 0.25 |
| Gentamicin | 2 | NT | NT | NT |
| Streptomycin | NT | 0.5 | 0.5 | 8 |
| Fluconazole | NT | NT | NT |  |
| DMSO | NA | NA | NA | NA |

NA: non active NT: not tested.

*Oxacillin, Gentamicin, Streptomycin and Fluconazole were used as positive controls.
